# Supplementary material for: Optimising the mutation screening strategy in Marfan syndrome and identifying genotypes with more severe aortic involvement
Source: Springer Nature journal article supplement (doi:10.1186/s13023-020-01569-4), 2020-10-15
Supplement: MOESM1 [file 18488054]

| Aortic involvement      | Variant classification | Gene   | Exon      | Nucleotide change              | Amino acid change   | Effect of mutation | Mutation type |
|-------------------------|------------------------|--------|-----------|--------------------------------|---------------------|--------------------|---------------|
| dilation                | Likely Pathogenic      | FBN1   | 50        | c.6158G>A                      | p.Cys2053Tyr        | missense           | DN Cys        |
| dilation                | Likely Pathogenic      | FBN1   | 32        | c.3959G>C                      | p.Cys1320Ser        | missense           | DN Cys        |
| dilation                | Likely Pathogenic      | FBN1   | 5         | c.400T>C                       | p.Cys134Arg         | missense           | DN Cys        |
| dilation                | Likely Pathogenic      | FBN1   | 34        | c.4171T>C                      | p.Cys1391Arg        | missense           | DN Cys        |
| dilation and dissection | Likely Pathogenic      | FBN1   | 63        | c.7769G>A                      | p.Cys2590Tyr        | missense           | DN Cys        |
| dilation and dissection | Likely Pathogenic      | FBN1   | 60        | c.7375T>C                      | p.Cys2459Arg        | missense           | DN Cys        |
| no                      | Likely Pathogenic      | FBN1   | 34        | c.4171T>C                      | p.Cys1391Arg        | missense           | DN Cys        |
| dilation and dissection | Likely Pathogenic      | FBN1   | 5         | c.407G>A                       | p.Cys136Tyr         | missense           | DN Cys        |
| dilation                | Likely Pathogenic      | FBN1   | 21        | c.2462G>A                      | p.Cys821Tyr         | missense           | DN Cys        |
| dilation                | Likely Pathogenic      | FBN1   | 54        | c.6542G>T                      | p.Cys2181Phe        | missense           | DN Cys        |
| dissection              | Likely Pathogenic      | FBN1   | 64        | c.7897T>C                      | p.Cys2633Arg        | missense           | DN Cys        |
| no                      | Likely Pathogenic      | FBN1   | 64        | c.7897T>C                      | p.Cys2633Arg        | missense           | DN Cys        |
| dilation                | Likely Pathogenic      | FBN1   | 37        | c.4472G>T                      | p.Cys1491Phe        | missense           | DN Cys        |
| dilation                | Likely Pathogenic      | FBN1   | 44        | c.5416T>G                      | p.Cys1806Gly        | missense           | DN Cys        |
| dilation                | Likely Pathogenic      | FBN1   | 38        | c.4691G>A                      | p.Cys1564Tyr        | missense           | DN Cys        |
| dilation                | Pathogenic             | FBN1   | 58        | c.7168T>C                      | p.Cys2390Arg        | missense           | DN Cys        |
| dilation                | Likely Pathogenic      | FBN1   | 19        | c.2287T>G                      | p.Cys763Gly         | missense           | DN Cys        |
| dilation                | Likely Pathogenic      | FBN1   | 24        | c.2809T>C                      | p.Cys937Arg         | missense           | DN Cys        |
| no                      | Pathogenic             | FBN1   | 25        | c.2953G>A                      | p.Gly985Arg         | missense           | DN            |
| dilation                | Likely Pathogenic      | FBN1   | 55        | c.6697C>T                      | p.Pro2233Ser        | missense           | DN            |
| no                      | Likely Pathogenic      | FBN1   | 8         | c.839A>T                       | p.Asn280Ile         | missense           | DN            |
| no                      | Pathogenic             | FBN1   | 2         | c.32T>A                        | p.Leu11Gln          | missense           | DN            |
| dissection              | Likely Pathogenic      | FBN1   | 17        | c.2113G>A                      | p.Ala705Thr         | missense           | DN            |
| dilation                | Likely Pathogenic      | FBN1   | 59        | c.7208T>C                      | p.Ile2403Thr        | missense           | DN            |
| dilation                | Likely Pathogenic      | FBN1   | 34        | c.4210G>A                      | p.Asp1404Asn        | missense           | DN            |
| dilation and dissection | Pathogenic             | FBN1   | 62        | c.7606G>A                      | p.Gly2536Arg        | missense           | DN            |
| dilation                | Likely Pathogenic      | FBN1   | 53        | c.6448C>T                      | p.Arg2150Cys        | missense           | DN            |
| no                      | Pathogenic             | FBN1   | 64        | c.8038C>T                      | p.Arg2680Cys        | missense           | DN            |
| no                      | Pathogenic             | FBN1   | 16        | c.1879C>T                      | p.Arg627Cys         | missense           | DN            |
| no                      | Pathogenic             | FBN1   | 2         | c.32T>A                        | p.Leu11Gln          | missense           | DN            |
| dilation                | Pathogenic             | FBN1   | 25        | c.2988T>A                      | p.Cys996STOP        | nonsense           | HI            |
| no                      | Pathogenic             | FBN1   | 66        | c.8326C>T                      | p.Arg2776STOP       | nonsense           | HI            |
| dilation                | Pathogenic             | FBN1   | 59        | c.7240C>T                      | p.Arg2414STOP       | nonsense           | HI            |
| no                      | Pathogenic             | FBN1   | 16        | c.1912G>T                      | p.Glu638STOP        | nonsense           | HI            |
| dilation                | Pathogenic             | FBN1   | 16        | c.1912G>T                      | p.Glu638STOP        | nonsense           | HI            |
| dilation                | Pathogenic             | FBN1   | 44        | c.5368C>T                      | p.Arg1790STOP       | nonsense           | HI            |
| dilation                | Pathogenic             | FBN1   | 44        | c.5368C>T                      | p.Arg1790STOP       | nonsense           | HI            |
| dilation                | Pathogenic             | FBN1   | 56        | c.6856G>T                      | p.Gly2286Ter        | nonsense           | HI            |
| dilation                | Pathogenic             | FBN1   | 29        | c.3534T>G                      | p.Tyr1178Ter        | nonsense           | HI            |
| dilation                | Pathogenic             | FBN1   | 10        | c.1090C>T                      | p.Arg364Ter         | nonsense           | HI            |
| dilation                | Pathogenic             | FBN1   | 10        | c.1063A>T                      | p.Lys355Ter         | nonsense           | HI            |
| dilation                | Pathogenic             | FBN1   | 38        | c.4615C>T                      | p.Arg1539Ter        | nonsense           | HI            |
| no                      | Pathogenic             | FBN1   | 14        | c.1693C>T                      | p.Arg565Ter         | nonsense           | HI            |
| dilation                | Pathogenic             | FBN1   | 14        | c.1693C>T                      | p.Arg565Ter         | nonsense           | HI            |
| dilation                | Pathogenic             | FBN1   | 66        | c.8326C>T                      | p.Arg2776Ter        | nonsense           | HI            |
| dilation                | Pathogenic             | FBN1   | 46        | c.5658Adel13ins8               | p.Gln1886Valfs21*   | frameshift         | HI            |
| dilation                | Pathogenic             | FBN1   | 8         | c.762delC                      | p.Leu256Serfs*74    | frameshift         | HI            |
| dilation                | Pathogenic             | FBN1   | 8         | c.762delC                      | p.Leu256Serfs*74    | frameshift         | HI            |
| dilation                | Pathogenic             | FBN1   | 66        | c.8474delG                     | p.Gly2825Glufs*21   | frameshift         | HI            |
| no                      | Pathogenic             | FBN1   | 66        | c.8474delG                     | p.Gly2825Glufs*21   | frameshift         | HI            |
| dilation and dissection | Pathogenic             | FBN1   | 19        | c.2232_2235delGACC             | p.Thr745IlefsTer26  | frameshift         | HI            |
| dilation                | Pathogenic             | FBN1   | 7         | c.648delC                      | p.Trp217GlyfsTer113 | frameshift         | HI            |
| no                      | Pathogenic             | FBN1   | 34        | c.4140_4152del                 | p.Cys1380TrpfsTer29 | frameshift         | HI            |
| dilation                | Pathogenic             | FBN1   | 39        | c.4787_4796delIGACCAAATCC      | p.Arg1596LeufsTer41 | frameshift         | HI            |
| dilation                | Pathogenic             | FBN1   | 24        | c.2805delT                     | p.Gln936SerfsTer6   | frameshift         | HI            |
| dilation                | Pathogenic             | FBN1   | 43        | c.5244_5245delITG              | p.Cys1748TrpfsTer18 | frameshift         | HI            |
| dilation and dissection | Pathogenic             | FBN1   | 16        | c.1936_1951dupGGTCTGGATGGCCGTG | p.Val651GlyfsTer9   | frameshift         | HI            |
| dilation                | Pathogenic             | FBN1   | intron 38 | c.4748-3T>G                    |                     | splice             | HI            |
| dilation                | Pathogenic             | FBN1   | intron48  | c.5917+1G>A                    |                     | splice             | HI            |
| dilation                | Pathogenic             | FBN1   | intron45  | c.5545+1G>T                    |                     | splice             | HI            |
| dilation                | Pathogenic             | FBN1   | intron 44 | c.5423-2A>C                    |                     | splice             | HI            |
| dilation                | Pathogenic             | FBN1   | intron 35 | c.4337-1G>T                    |                     | splice             | HI            |
| dilation                | Pathogenic             | FBN1   | intron 17 | c.2114-1G>A                    |                     | splice             | HI            |
| dilation                | Pathogenic             | FBN1   | intron 46 | c.5671+1G>A                    |                     | splice             | HI            |
| dilation                | Pathogenic             | FBN1   | intron 35 | c.4337-2A>G                    |                     | splice             | HI            |
| dissection              | Pathogenic             | FBN1   | intron 51 | c.6313+1G>T                    |                     | splice             | HI            |
| dilation                | Pathogenic             | FBN1   | intron 51 | c.6313+1G>T                    |                     | splice             | HI            |
| dilation                | Pathogenic             | FBN1   | intron 51 | c.6313+1G>T                    |                     | splice             | HI            |
| dilation                | Pathogenic             | FBN1   | intron 24 | c.2855-2A>C                    |                     | splice             | HI            |
| dilation                | Pathogenic             | FBN1   | intron 18 | c.2168-1G>A                    |                     | splice             | HI            |
| dilation                | Pathogenic             | FBN1   | intron 18 | c.2168-1G>A                    |                     | splice             | HI            |
| dilation                | Likely Pathogenic      | FBN1   | 30        | c.3632_3634delITCT             | p.Phe1211del        | in frame del       | HI            |
| dilation                | Likely Pathogenic      | FBN1   | 30        | c.3632_3634delITCT             | p.Phe1211del        | in frame del       | HI            |
| dilation                | Likely Pathogenic      | FBN1   | 57        | c.6943_6945delIACC             | p.Thr2315del        | in frame del       | HI            |
| dissection              | Pathogenic             | FBN1   | exon 3-4  |                                |                     | CNV                | HI            |
| dilation                | Pathogenic             | FBN1   | exon 1-2  |                                |                     | CNV                | HI            |
| dilation                | Pathogenic             | FBN1   | exon 2-4  |                                |                     | CNV                | HI            |
| dilation and dissection | Pathogenic             | FBN1   | exon 2-4  |                                |                     | CNV                | HI            |
| dilation                | Pathogenic             | TGFB2  | 7         | c.1039_1040delICT              | p.Leu347ThrfsTer6   | frameshift         | HI            |
| dilation                | Pathogenic             | TGFB2  | 7         | c.1039_1040delICT              | p.Leu347ThrfsTer6   | frameshift         | HI            |
| dilation                | Pathogenic             | TGFBR2 | 7         | c.1558C>T                      | p.Arg520Ter         | nonsense           | HI            |
| dilation                | Likely Pathogenic      | TGFBR1 | 4         | c.605C>T                       | p.Ala202Val         | nonsense           | DN            |
| dilation                | Likely Pathogenic      | TGFR1  | 4         | c.797A>T                       | p.Asp266Val         | missense           | DN            |
| dilation                | Likely Pathogenic      | SMAD3  | 2         | c.238C>T                       | p.Arg80Trp          | missense           | DN            |
